# Supplementary material for: Impact of the Work Environment on Nurse Outcomes: A Mediation Analysis
Source: PubMed Central journal article supplement (PMC10903131; doi:10.1177/01939459241230369), 2024-02-11
Supplement: sj-pdf-1-wjn-10.1177_01939459241230369.pdf [file sj-pdf-1-wjn-10.1177_01939459241230369.pdf]

**Supplementary Table.** *t*-tests results comparing English and French questionnaires

|                      | <b>English</b> | <b>French</b> |                      |                |
|----------------------|----------------|---------------|----------------------|----------------|
| <b>Variables</b>     | Mean (SD)      | Mean (SD)     | <i>t</i> -value (df) | <i>p</i> value |
| Work environment     | 2.97 (.41)     | 2.92 (.38)    | 1.03(417)            | .306           |
| COVID-19             | 3.93 (.63)     | 3.99 (.93)    | -.59 (137)           | .554           |
| Missed care          | 2.85 (.87)     | 2.92 (.83)    | -.69 (407)           | .494           |
| Scope of practice    | 4.55 (.77)     | 4.47 (.74)    | .98 (417)            | .372           |
| Emotional exhaustion | 3.18 (.50)     | 3.09 (.61)    | 1.60 (153)           | .110           |
| Intent to leave      | 2.02 (1.16)    | 1.92 (.76)    | .93 (277)            | .352           |

Note. SD = standard deviation, df = degrees of freedom
